# Supplementary material
Source: Springer Nature journal article supplement (https://www.springermedizin.de/resource/supplementary/13044_2010_22_MOESM4_ESM.pdf/9659972)

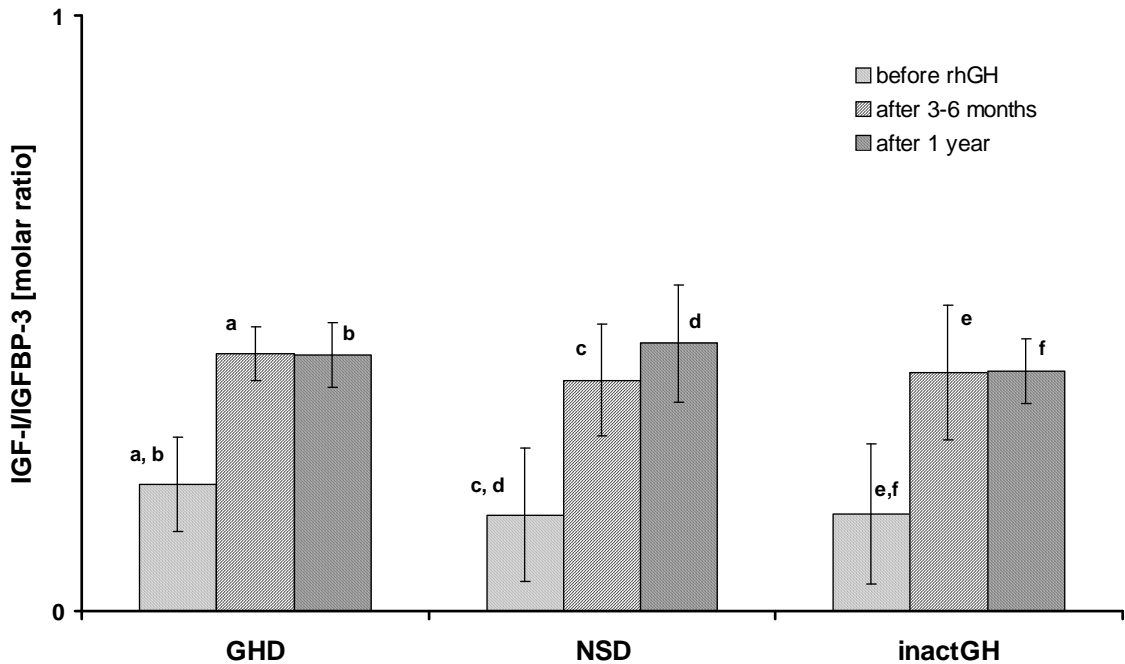

Significant differences: a, b –  $p < 0.00001$ ; c –  $p < 0.0005$ , d –  $p < 0.00005$ , e, f –  $p < 0.001$

Supplement: MOESM4 [file 9659972]
